# Supplementary material
Source: HighWire-hosted journal article supplement (https://bmjopen.bmj.com/content/12/1/e057169)
Supplement: inline-supplementary-material-1 [file inline-supplementary-material-1.pdf]

## Appendix 1

Detailed search string from Pubmed.

defensive medicine OR defensive practice OR defensive practices OR medicine, defensive

("defensive medicine"[MeSH Terms] OR ("defensive"[All Fields] AND "medicine"[All Fields]) OR "defensive medicine"[All Fields]) OR ("defensive medicine"[MeSH Terms] OR ("defensive"[All Fields] AND "medicine"[All Fields]) OR "defensive medicine"[All Fields]) OR ("defensive"[All Fields] AND "practice"[All Fields]) OR "defensive practice"[All Fields]) OR ("defensive medicine"[MeSH Terms] OR ("defensive"[All Fields] AND "medicine"[All Fields]) OR "defensive medicine"[All Fields]) OR ("defensive"[All Fields] AND "practices"[All Fields]) OR "defensive practices"[All Fields]) OR ("defensive medicine"[MeSH Terms] OR ("defensive"[All Fields] AND "medicine"[All Fields]) OR "defensive medicine"[All Fields]) OR ("medicine"[All Fields] AND "defensive"[All Fields]))

## Appendix 2

Detailed chain search and all references of the studies' definition of defensive medicine. Listed after articulated definition of defensive medicine complement to Supplementary Table 1 –

Definitions of defensive medicine.

\*No reference to the definition of defensive medicine. †Full text not available.

### Antoci et al. 2016, Italy

1. Tancredi LR, Baroness JA. The problem of defensive medicine. *Science*. 1978; 200 (4344): 879–882. PMID: 644329
  - 1.1. Report of the Secretary's Commission on Medical Malpractice (DHEW Publ. No. OS-73-89, Department of Health, Education, and Welfare, Washington, D.C., 1973) †
  - 1.2. *Duke Law J*. 1971, 939 (1971) †
2. Kessler D, McClellan M. Do doctors practice defensive medicine? *Q J Econ*. 1996; 111 (2): 353–390. †

### Aranaz Andrés et al. 2020, Spain

1. Mira, J.J.; Carrillo, I.; Silvestre, C.; Pérez-Pérez, P.; Nebot, C.; Olivera, G.; González de Dios, J.; Aranaz Andrés, J.M. Drivers and strategies for avoiding overuse. A cross-sectional study to explore the experience of Spanish primary care providers handling uncertainty and patients' requests. *BMJ Open* 2018, 8, e021339. \*
2. Pellino, I.M.; Pellino, G. Consequences of defensive medicine, second victims, and clinical-judicial syndrome on surgeons' medical practice and on health service. *Updat. Surg*. 2015, 67, 331–337.
  - 2.1. McQuade JS. The medical malpractice crisis - reflections on the alleged causes and proposed cures: discussion paper. *J R Soc Med* 1991;84:408-11. \*
  - 2.2. US Congress Office of Technology Assessment. *Defensive medicine and medical malpractice*. Washington, DC: US Government Printing Office, 1994. \*

### Bourne et al 2015, UK

1. Jain A, Ogdan J. General practitioners' experiences of patients' complaints: qualitative study. *BMJ* 1999;318:1596–9. \*

**Bourne et al. 2016, UK**

1. Davis J. Complaints procedures traumatise doctors and could lead to patient harm, warn researchers. Pulse Today. 15–1–2015. [http:// www.pulsetoday.co.uk/your-practice/regulation/complaints-procedures-traumatise-doctors-and-could-lead-to-patient-harm-warn-researchers/20008922.fullarticle](http://www.pulsetoday.co.uk/your-practice/regulation/complaints-procedures-traumatise-doctors-and-could-lead-to-patient-harm-warn-researchers/20008922.fullarticle) (accessed 15 Sep 2015). †
2. Verhoef LM, Weenink JW, Winters S, et al. The disciplined healthcare professional: a qualitative interview study on the impact of the disciplinary process and imposed measures in the Netherlands. *BMJ Open* 2015;5:e009275. \*
3. Jain A, Ogden J. General practitioners' experiences of patients' complaints: qualitative study. *BMJ* 1999;318:1596–9. \*
4. Shanafelt TD, Balch CM, Dyrbye L, et al. Special report: suicidal ideation among American surgeons. *Arch Surg* 2011;146:54–62. \*
5. Cooper CL, Rout U, Faragher B. Mental health, job satisfaction, and job stress among general practitioners. *BMJ* 1989;298:366–70. \*
6. Cunningham W, Dovey S. The effect on medical practice of disciplinary complaints: potentially negative for patient care. *NZ Med J* 2000;113:464–7.
  - 6.1. Rosser WW. Threat of litigation. How does it effect family practice? *Can Fam Physician* 1994; 40: 645-8.
    - 6.1.1. Veldhuis M. Defensive behaviour of Dutch family physicians: Widening the concept. *Fam Med* 1994; 226: 27-9.
      - 6.1.1.1. Hershey N. The defensive practice of medicine: myth or reality. *Milbank Mem Fund Q* 1972;50:69-97. \*
    - 6.2. Veldhuis M. Defensive behaviour of Dutch family physicians: Widening the concept. *Fam Med* 1994; 226: 27-9.
      - 6.2.1. Hershey N. The defensive practice of medicine: myth or reality. *Milbank Mem Fund Q* 1972;50:69-97. \*
  7. Bourne T, Wynants L, Peters M, et al. The impact of complaints procedures on the welfare, health and clinical practise of 7926 doctors in the UK: a cross-sectional survey. *BMJ Open* 2015;5: e006687.
    - 7.1. Jain A, Ogden J. General practitioners' experiences of patients' complaints: qualitative study. *BMJ* 1999;318:1596–9. \*

**Bourne et al. 2017, UK**

- No reference.

**Bourne et al. 2019, UK**

1. Studdert DM, Mello MM, Sage WM, et al. Defensive medicine among high-risk specialist physicians in a volatile malpractice environment. *JAMA* 2005;293:2609–17.
  - 1.1. Hershey N. The defensive practice of medicine: myth or reality. *Milbank Mem Fund Q* 1972;50:69-97. \*
  - 1.2. Klingman D, Localio AR, Sugarman J, et al. Measuring defensive medicine using clinical scenario surveys. *J Health Polit Policy Law*. 1996;21:185-217. \*
  - 1.3. Rosenblatt RA, Detering B. Changing patterns of obstetric practice in Washington State: the impact of tort reform. *Fam Med*. 1988;20:101-107. †
  - 1.4. Grumbach K, Vranizan K, Rennie D, Luft HS. *Charges for Obstetric Liability Insurance and Discontinuation of Obstetric Practice in New York: Report to the Office of Technology Assessment*. Washington, DC: Office of Technology Assessment; 1993. †
2. Ortashi O, Virdee J, Hassan R, et al. The practice of defensive medicine among hospital doctors in the United Kingdom. *BMC Med Ethics* 2013;14:42.

- 2.1. Toker A, Shvarts S, Perry ZH, et al: Clinical guidelines, defensive medicine, and the physician between the two. *Am J Otolaryngol* 2004, 25(4):245–250.
  - 2.1.1. Van Boven K, Dijksterhuis P, Lamberts H. Defensive testing in Dutch family practice: Is the grass greener on the other side of the ocean? *Journal of Family Practice*. 1997;44(5):468-72. \*
  - 2.1.2. Summerton N. Positive and negative factors in defensive medicine: A questionnaire study of general practitioners. *British medical journal*. 1995;310(6971):27-9.
    - 2.1.2.1. McQuade JS. The medical malpractice crisis-reflections on the alleged causes and proposed cures: discussion paper. *J R Soc Med* 1991;84:408-11. \*
    - 2.1.2.2. Hershey N. Quoted in McKinlay JB, ed. *Politics and law in health care policy*. New York: Milbank Memorial Fund, 1973. †
    - 2.1.2.3. Dingwall R. Quoted in Hoyte P. *Medical negligence litigation*. *Medical Law Review*. (In press.) †
- 2.2. Corrigan J, Wagner J, Wolfe L, et al: Report from congress medical malpractice reform and defensive medicine. *Cancer Invest* 1996, 14(3):277–284.
  - 2.2.1. OTA. Office of Technology Assessment. *Defensive medicine and medical malpractice*. Washington (DC). (Online) Available from: <http://ota.fas.org/reports/9405.pdf>. 1994 (Publication No. OTA-H-602). Accessed July 2019. \*
- 2.3. Summerton N: Trends in negative defensive medicine within general practice. *Br J Gen Pract* 2000, 50:565–566. \*

#### **Domingues et al. 2014, Portugal**

1. Hammond C. The decline of the profession of medicine. *Obstet Gynecol* 2002;100:221e5. \*
2. Laros R. Medical-legal issues in obstetrics and gynecology. *Am J Obstet Gynecol* 2005;192:1883e9. \*
3. Mavroforou A, Mavrophoros D, Koumantakis E, Michalodimitrakis E. Liability in prenatal screening. *Ultrasound Obstet Gynecol* 2003;21:525e8. †
4. Hammond C, Schwartz P. Ethical issues related to medical expert testimony. *Obstet Gynecol* 2005;106:1055e8. †
5. Pearlman M, Gluck P. Medical liability and patient safety: setting the proper course. *Obstet Gynecol* 2005;105:941e3. \*
6. Bettles B, Strunk A, Coleman V, Schulkin J. Professional liability and other career pressures: impact on obstetrician-gynecologists' career satisfaction. *Obstet Gynecol* 2004;103:967e73. \*
7. American College of Obstetricians and Gynecologists. *Coping with the stress of medical professional liability litigation*. Committee Opinion; February 2005. No 309. †
8. Dubay L, Kaestner R, Waidmann T. Medical malpractice liability and its effect on prenatal care utilization and infant health. *J Health Econ* 2001;20:591e 611.
  - 8.1. Dubay, L., Kaestner, R., 1999. The impact of malpractice fears on cesarean section rates. *Journal of Health Economics* 18 (4), 491–522.
    - 8.1.1. U.S. Senate Subcommittee on Nutrition and Human Needs, 1969. *Medical Malpractice: The patient versus the Physician*. Committee Print, 91<sup>st</sup> Congress, 1<sup>st</sup> Session, U.S. Government Printing Office, Washington DC. †
    - 8.1.2. Marieskind, H.I., 1979. *An evaluation of cesarean section in the United States*. Final Report submitted to the Department of Health, Education, and Welfare, Office of the Assistant Secretary for Planning and Evaluation/Health. †
  - 8.2. Localio A.R., et al., 1993. Relationship between malpractice claims and cesarean delivery. *The Journal of the American Medical Association*, 269 (3), 366–373.
    - 8.2.1. Danforth DN. Cesarean section. *JAMA*. 1985; 253:811-818. \*
    - 8.2.2. Sachs BP. Is the rising rate of cesarean sections a result of more defensive medicine? In: Rostow VP, Bulger RJ, eds. *Medical Professional Liability and the Delivery of Obstetrical Care*. Washington, DC: National Academy Press; 1989:27-40. †

- 8.2.3. Shiono PH, Fielden JG, McNellis D, Rhoads GG, Pearse WH. Recent trends in cesarean birth and trial of labor rates in the United States. *JAMA*. 1987;257:494-497. \*
- 8.2.4. The Impact of Randomized Clinical Trials on Health Policy and Medical Practice: Background Paper. Washington, DC: US Congress, Office of Technology Assessment; 1983:13. OTA-BP-H-22. \*
- 8.3. Sloan, F.A., Entman, S.S., Reilly, B.A., Glass, C.A., Hickson, G.B., Zhang, H.H., 1997. Tort liability and obstetricians' care levels. *International Review of Law and Economics* 17, 245–260. †
- 8.4. Tancredi, L.R., Barondess, J.A., 1978. The problem of defensive medicine. *Science* 200, 879–882.
- 8.4.1. Report of the Secretary's Commission on Medical Malpractice (DHEW Publ. No. OS-73-89, Department of Health, Education, and Welfare, Washington, D.C., 1973) †
- 8.4.2. *Duke Law J*. 1971, 939 (1971) †
9. Howard P. Is the medical justice system broken? *Obstet Gynecol* 2003;102: 446e9. \*
10. Owolabi T, Farine D. Pour presenter une opinion sur un cas médico-legal. *J Obstet Gynecol Can* 2002;24(7):593e5. †
11. Kravitz R, Leigh P, Samuels S, Schembri M, Gilbert W. Tracking career satisfaction and perceptions of quality among US obstetricians and gynecologists. *Obstet Gynecol* 2003;102:463e70. \*
12. Chan B, Willett J. Factors influencing participation in obstetrics by obstetrician-gynecologists. *Obstet Gynecol* 2004;103:493e8. \*
13. MacLennan AH, Spencer MK. Projections of Australian obstetricians ceasing practice and the reasons. *Med J Aust* 2002;176:425e8. \*
14. Queenan J. Professional liability insurance: still a crisis. *Obstet Gynecol* 2005;105:1285e6. \*
15. Frigoletto FD, Greene MF. Is there a sea change ahead for obstetrics and gynecology? *Obstet Gynecol* 2002;100:1342e3. \*
16. Queenan J. Professional liability crisis: a road map to success. *Obstet Gynecol* 2004;104:429e30. \*

### Feess 2012, Germany

1. Dubay, L., Kaestner, R., Waidmann, T.: The impact of malpractice fears on cesarean section rates. *J. Health Econ.* 18, 491–522 (1999)
- 1.1. U.S. Senate Subcommittee on Nutrition and Human Needs, 1969. *Medical Malpractice: The patient versus the Physician*. Committee Print, 91<sup>st</sup> Congress, 1<sup>st</sup> Session, U.S. Government Printing Office, Washington DC. †
- 1.2. Marieskind, H.I., 1979. An evaluation of cesarean section in the United States. Final Report submitted to the Department of Health, Education, and Welfare, Office of the Assistant Secretary for Planning and Evaluation/Health. †
2. Kessler, D.P., McClellan, M.B.: How liability law affects medical productivity. *J. Health Econ.* 21, 931–955 (2002)
- 2.1. Dubay, L., Kaestner, R., Waidmann, T.: The impact of malpractice fears on cesarean section rates. *J. Health Econ.* 18, 491–522 (1999)
- 2.1.1. U.S. Senate Subcommittee on Nutrition and Human Needs, 1969. *Medical Malpractice: The patient versus the Physician*. Committee Print, 91<sup>st</sup> Congress, 1<sup>st</sup> Session, U.S. Government Printing Office, Washington DC. †
- 2.1.2. Marieskind, H.I., 1979. An evaluation of cesarean section in the United States. Final Report submitted to the Department of Health, Education, and Welfare, Office of the Assistant Secretary for Planning and Evaluation/Health. †

- 2.2. Kessler, D., McClellan, M., 1996. Do doctors practice defensive medicine? *Quarterly Journal of Economics* 111, 353-390. †
- 2.3. Kessler, D., McClellan, M., 2000. Malpractice law and health care reforms: optimal liability policy in an era of managed care. NBER WP 7537. †
3. Localio, A.R., Lawthers, A.G., Bengtson, J.M., Hebert, L.E., Weaver, S.L., Brennan, T.A. et al.: Relationship between malpractice claims and cesarean delivery. *J. Am. Med. Assoc.* 269(3), 366–373 (1993)
  - 3.1. Danforth DN. Cesarean section. *JAMA.* 1985; 253:811-818. \*
  - 3.2. Sachs BP. Is the rising rate of cesarean sections a result of more defensive medicine? In: Rostow VP, Bulger RJ, eds. *Medical Professional Liability and the Delivery of Obstetrical Care.* Washington, DC: National Academy Press; 1989:27-40. †
  - 3.3. Shiono PH, Fielden JG, McNellis D, Rhoads GG, Pearse WH. Recent trends in cesarean birth and trial of labor rates in the United States. *JAMA.* 1987;257:494-497. \*
  - 3.4. The Impact of Randomized Clinical Trials on Health Policy and Medical Practice: Background Paper. Washington, DC: US Congress, Office of Technology Assessment; 1983:13. OTA-BP-H-22. \*

#### **Ferorelli et al. 2020, Italy**

1. Yan SC, Hulsbergen AFC, Muskens IS, van Dam M, Gormley WB, Broekman MLD, Smith TR (2017) Defensive medicine among neurosurgeons in the Netherlands: a national survey. *Acta Neurochir (Wien).* 159(12):2341–2350. <https://doi.org/10.1007/s00701-017-3323-9>
  - 1.1. Studdert DM, Mello MM, Brennan TA (2004) Medical malpractice. *N Engl J Med* 350:283–292. <https://doi.org/10.1056/NEJMp035470>
    - 1.1.1. Defensive medicine and medical malpractice. OTA-H-602. Washington, D.C.: U.S. Congress, Office of Technology Assessment, 1994. \*
  - 1.2. Tancredi LR, Barondess JA (1978) The problem of defensive medicine. *Science* 200:879–882
    - 1.2.1. Report of the Secretary's Commission on Medical Malpractice (DHEW Publ. No. OS-73-89, Department of Health, Education, and Welfare, Washington, D.C., 1973) †
    - 1.2.2. *Duke Law J.* 1971, 939 (1971) †
2. Ramella S, Mandoliti G, Trodella L, D'Angelillo RM (2015) The first survey on defensive medicine in radiation oncology. *Radiol Med* 120(5):421–429. <https://doi.org/10.1007/s11547-014-0465-1> Epub 2014 Oct 30
  - 2.1. US Congress; Office of Technology Assessment (1994). Defensive medicine and medical malpractice. US Government Printing Office, Washington, DC (publication OTA-H-602) \*
  - 2.2. Hershey N (1972) The defensive practice of medicine: myth or reality. *Milbank Mem Fund Q* 50:69–98 \*

#### **Gadjradj et al 2020, Europe, Africa, Asia & Oceania, North America and South America**

1. Studdert DM, Mello MM, Sage WM, et al. Defensive medicine among high-risk specialist physicians in a volatile malpractice environment. *JAMA.* 2005;293(21):2609–2617.
  - 1.1. Hershey N. The defensive practice of medicine: myth or reality. *Milbank Mem Fund Q* 1972;50:69-97. \*
  - 1.2. Klingman D, Localio AR, Sugarman J, et al. Measuring defensive medicine using clinical scenario surveys. *J Health Polit Policy Law.* 1996;21:185-217. \*
  - 1.3. Rosenblatt RA, Detering B. Changing patterns of obstetric practice in Washington State: the impact of tort reform. *Fam Med.* 1988;20:101-107. †

- 1.4. Grumbach K, Vranizan K, Rennie D, Luft HS. *Charges for Obstetric Liability Insurance and Discontinuation of Obstetric Practice in New York: Report to the Office of Technology Assessment*. Washington, DC: Office of Technology Assessment; 1993. †
2. Kessler DP, Summerton N and Graham JR. Effects of the medical liability system in Australia, the UK, and the USA. *Lancet* 2006; 368: 240–246. \*
3. Yan SC, Hulsbergen AFC, Muskens IS, et al. Defensive medicine among neurosurgeons in the Netherlands: a national survey. *Acta Neurochir (Wien)*. 2017;159(12):2341–2350.
  - 3.1. Studdert DM, Mello MM, Brennan TA (2004) Medical malpractice. *N Engl J Med* 350:283–292. <https://doi.org/10.1056/NEJMhpr035470>
    - 3.1.1. Defensive medicine and medical malpractice. OTA-H-602. Washington, D.C.: U.S. Congress, Office of Technology Assessment, 1994. \*
    - 3.2. Tancredi LR, Barondess JA (1978) The problem of defensive medicine. *Science* 200:879–882
      - 3.2.1. Report of the Secretary's Commission on Medical Malpractice (DHEW Publ. No. OS-73-89, Department of Health, Education, and Welfare, Washington, D.C., 1973) †
      - 3.2.2. *Duke Law J*. 1971, 939 (1971) †

#### **Garcia-Retamero et al. 2014, Spain**

1. Chen XY. Defensive medicine or economically motivated corruption? A confucian reflection on physician care in China today *The Journal of Medicine and Philosophy*, 2007; 32: 635–648. \*
2. Nakajima K, Keyes C, Kuroyanagi T, Tatara K. Medical malpractice and legal resolution systems in Japan. *Journal of the American Medical Association*, 2001; 285: 1632–1640. \*
3. Summerton N. Trends in negative defensive medicine within general practice. *British Journal of General Practice*, 2000; 50: 565–566. \*
4. Veldhuis M. Defensive behaviour of Dutch family physicians: widening the concept. *Family Medicine*, 1994; 26: 27–29.
  - 4.1. Hershey N. The defensive practice of medicine: myth or reality. *Milbank Mem Fund Q* 1972;50:69-97. \*
5. Catino M, Celotti S. The problem of defensive medicine: two Italian surveys. *Studies in Health Technology & Informatics*, 2009; 148: 206–221.
  - 5.1. US Congress, Office of Technology Assessment (1994), Defensive medicine and medical malpractice. OTA – H – 602, DC: US Government Printing Office, Washington. \*
6. Brilla R, Evers S, Deutschlander A, Wartenberg KE. Are neurology residents in the United States being taught defensive medicine? *Clinical Neurology & Neurosurgery*, 2006; 108: 374–377. \*
7. Steurer J, Held U, Schmidt M, Gigerenzer G, Tag B, Bachmann LM. Legal concerns trigger prostate-specific antigen testing. *Journal of Evaluation in Clinical Practice*, 2009; 15: 390–392.
  - 7.1. Studdert DM, Mello MM, Sage WM, et al. Defensive medicine among high-risk specialist physicians in a volatile malpractice environment. *JAMA* 2005;293:2609–17.
    - 7.1.1. Hershey N. The defensive practice of medicine: myth or reality. *Milbank Mem Fund Q* 1972;50:69-97. \*
    - 7.1.2. Klingman D, Localio AR, Sugarman J, et al. Measuring defensive medicine using clinical scenario surveys. *J Health Polit Policy Law*. 1996;21:185-217. \*
    - 7.1.3. Rosenblatt RA, Detering B. Changing patterns of obstetric practice in Washington State: the impact of tort reform. *Fam Med*. 1988;20:101-107. †
    - 7.1.4. Grumbach K, Vranizan K, Rennie D, Luft HS. *Charges for Obstetric Liability Insurance and Discontinuation of Obstetric Practice in New York: Report to the Office of Technology Assessment*. Washington, DC: Office of Technology Assessment; 1993. †

#### **Laarman et al. 2019, The Netherlands**

1. Panella M, Rinaldi C, Vanhaecht K, et al. [Second victims of medical errors: a systematic review of the literature]. *Ig Sanita Pubbl* 2014;70:9–28. †
2. Studdert DM, Mello MM, Sage WM, et al. Defensive medicine among high-risk specialist physicians in a volatile malpractice environment. *JAMA* 2005;293:2609–17.
  - 2.1. Hershey N. The defensive practice of medicine: myth or reality. *Milbank Mem Fund Q* 1972;50:69-97. \*
  - 2.2. Klingman D, Localio AR, Sugarman J, et al. Measuring defensive medicine using clinical scenario surveys. *J Health Polit Policy Law*. 1996;21:185-217. \*
  - 2.3. Rosenblatt RA, Detering B. Changing patterns of obstetric practice in Washington State: the impact of tort reform. *Fam Med*. 1988;20:101-107. †
  - 2.4. Grumbach K, Vranizan K, Rennie D, Luft HS. *Charges for Obstetric Liability Insurance and Discontinuation of Obstetric Practice in New York: Report to the Office of Technology Assessment*. Washington, DC: Office of Technology Assessment; 1993. †
3. Assing Hvidt E, Lykkegaard J, Pedersen LB, et al. How is defensive medicine understood and experienced in a primary care setting? A qualitative focus group study among Danish general practitioners. *BMJ Open* 2017;7:e019851.
  - 3.1. Pellino IM, Pellino G. Consequences of defensive medicine, second victims, and clinical-judicial syndrome on surgeons' medical practice and on health service. *Updates Surg* 2015;67:331–7.
    - 3.1.1. McQuade JS. The medical malpractice crisis - reflections on the alleged causes and proposed cures: discussion paper. *J R Soc Med* 1991;84:408-11. \*
    - 3.1.2. US Congress Office of Technology Assessment. *Defensive medicine and medical malpractice*. Washington, DC: US Government Printing Office, 1994. \*
  - 3.2. US Congress Office of Technology Assessment. *Defensive medicine and medical malpractice*. Washington, DC: US Government Printing Office, 1994. \*
  - 3.3. Panella M, Rinaldi C, Leigheb F, et al. Prevalence and costs of defensive medicine: a national survey of Italian physicians. *J Health Serv Res Policy* 2017:211–7.
    - 3.3.1. US Congress, Office of Technology Assessment. Defensive medicine and medical malpractice, OTA-H – 602. Washington, DC: US Government Printing Office, July 1994. \*
    - 3.3.2. Studdert DM, Mello MM, Sage WM, et al. Defensive medicine among high-risk specialist physicians in a volatile malpractice environment. *JAMA* 2005; 293: 2609–2617.
      - 3.3.2.1. Hershey N. The defensive practice of medicine: myth or reality. *Milbank Mem Fund Q* 1972;50:69-97. \*
      - 3.3.2.2. Klingman D, Localio AR, Sugarman J, et al. Measuring defensive medicine using clinical scenario surveys. *J Health Polit Policy Law*. 1996;21:185-217. \*
      - 3.3.2.3. Rosenblatt RA, Detering B. Changing patterns of obstetric practice in Washington State: the impact of tort reform. *Fam Med*. 1988;20:101-107. †
      - 3.3.2.4. Grumbach K, Vranizan K, Rennie D, Luft HS. *Charges for Obstetric Liability Insurance and Discontinuation of Obstetric Practice in New York: Report to the Office of Technology Assessment*. Washington, DC: Office of Technology Assessment; 1993. †
    - 3.3.3. Kessler DP, Summerton N and Graham JR. Effects of the medical liability system in Australia, the UK, and the USA. *Lancet* 2006; 368: 240–246. \*
    - 3.3.4. Ortashi O, Virdee J, Hassan R, et al. The practice of defensive medicine among hospital doctors in the United Kingdom. *BMC Med Ethics* 2013; 14: 42.
      - 3.3.4.1. Toker A, Shvarts S, Perry ZH, et al: Clinical guidelines, defensive medicine, and the physician between the two. *Am J Otolaryngol* 2004, 25(4):245–250.
        - 3.3.4.1.1. Van Boven K, Dijksterhuis P, Lamberts H. Defensive testing in Dutch family practice: Is the grass greener on the other side of the ocean? *Journal of Family Practice*. 1997;44(5):468-72. \*
        - 3.3.4.1.2. Summerton N. Positive and negative factors in defensive medicine: A questionnaire study of general practitioners. *British medical journal*. 1995;310(6971):27-9.
          - 3.3.4.1.2.1. McQuade JS. The medical malpractice crisis - reflections on the alleged causes and proposed cures: discussion paper. *J R Soc Med* 1991;84:408-11. \*
          - 3.3.4.1.2.2. Hershey N. Quoted in McKinlay JB, ed. *Politics and law in health care policy*. New York: Milbank Memorial Fund, 1973. †



- 3.3.4.1.2.3. Dingwall R. Quoted in Hoyte P. Medical negligence litigation. *Medical Law Review*. (In press.) †
- 3.3.4.2. Corrigan J, Wagner J, Wolfe L, et al: Report from congress medical malpractice reform and defensive medicine. *Cancer Invest* 1996, 14(3):277–284.
- 3.3.4.2.1. OTA. Office of Technology Assessment. Defensive medicine and medical malpractice. Washington (DC). (Online) Available from: <http://ota.fas.org/reports/9405.pdf>. 1994 (Publication No. OTA-H-602). \*
- 3.3.4.3. Summerton N: Trends in negative defensive medicine within general practice. *Br J Gen Pract* 2000, 50:565–566. \*
- 3.3.5. Sathiyakumar V, Jahangir AA, Mir HR, et al. The prevalence and costs of defensive medicine among orthopaedic trauma surgeons: a national survey study. *J Orthop Trauma* 2013 Oct; 27: 592–597.
- 3.3.5.1. US Congress, Office of Technology Assessment. Defensive medicine and medical malpractice, OTA-H – 602. Washington, DC: US Government Printing Office, July 1994. \*
- 3.3.5.2. Hershey N. The defensive practice of medicine: myth or reality. *Milbank Mem Fund Q* 1972;50:69-97. \*
- 3.3.6. Panella M, Leigh F, Rinaldi C, et al. Defensive medicine: overview of the literature. *Ig Sanita Pubbl* 2015; 71: 335–351. †
- 3.3.7. Asher E, Greenberg-Dotan S, Halevy J, et al. Defensive medicine in Israel – a nationwide survey. *PLoS One* 2012; 7: e42613.
- 3.3.7.1. US Congress, Office of Technology Assessment. Defensive medicine and medical malpractice, OTA-H – 602. Washington, DC: US Government Printing Office, July 1994. \*
- 3.4. Studdert DM, Mello MM, Sage WM, *et al*. Defensive medicine among high-risk specialist physicians in a volatile malpractice environment. *JAMA* 2005;293:2609–17.
- 3.4.1. Hershey N. The defensive practice of medicine: myth or reality. *Milbank Mem Fund Q* 1972;50:69-97. \*
- 3.4.2. Klingman D, Localio AR, Sugarman J, et al. Measuring defensive medicine using clinical scenario surveys. *J Health Polit Policy Law*. 1996;21:185-217. \*
- 3.4.3. Rosenblatt RA, Detering B. Changing patterns of obstetric practice in Washington State: the impact of tort reform. *Fam Med*. 1988;20:101-107. †
- 3.4.4. Grumbach K, Vranizan K, Rennie D, Luft HS. *Charges for Obstetric Liability Insurance and Discontinuation of Obstetric Practice in New York: Report to the Office of Technology Assessment*. Washington, DC: Office of Technology Assessment; 1993. †

**Litchfield et al. 2014, UK**

- No reference.

**Mira et al. 2018, Spain**

- No reference.

**Ortashi et al. 2013, UK**

1. Toker A, Shvarts S, Perry ZH, et al: Clinical guidelines, defensive medicine, and the physician between the two. *Am J Otolaryngol* 2004, 25(4):245–250.



- 1.1. Van Boven K, Dijksterhuis P, Lamberts H. Defensive testing in Dutch family practice: Is the grass greener on the other side of the ocean? *Journal of Family Practice*. 1997;44(5):468-72. \*
- 1.2. Summerton N. Positive and negative factors in defensive medicine: A questionnaire study of general practitioners. *British medical journal*. 1995;310(6971):27-9.
  - 1.2.1. McQuade JS. The medical malpractice crisis - reflections on the alleged causes and proposed cures: discussion paper. *J R Soc Med* 1991;84:408-11. \*
  - 1.2.2. Hershey N. Quoted in McKinlay JB, ed. *Politics and law in health care policy*. New York: Milbank Memorial Fund, 1973. †
  - 1.2.3. Dingwall R. Quoted in Hoyte P. *Medical negligence litigation*. *Medical Law Review*. (In press.) †
2. Corrigan J, Wagner J, Wolfe L, et al: Report from congress medical malpractice reform and defensive medicine. *Cancer Invest* 1996, 14(3):277–284.
  - 2.1. OTA. Office of Technology Assessment. *Defensive medicine and medical malpractice*. Washington (DC). (Online) Available from: <http://ota.fas.org/reports/9405.pdf>. 1994 (Publication No. OTA-H-602). \*
3. Summerton N: Trends in negative defensive medicine within general practice. *Br J Gen Pract* 2000, 50:565–566. \*

#### **Pausch et al. 2020, Germany**

1. Bishop TF, Federman AD, Keyhani S. Physicians' views on defensive medicine: a national survey. *Archives of Internal Medicine*. 2010; 170(12):1081–3. <https://doi.org/10.1001/archinternmed.2010.155> PMID: 20585077 \*

#### **Renkema et al. 2014, Italy**

1. Studdert DM, Mello MM, Sage WM, et al. Defensive medicine among high-risk specialist physicians in a volatile malpractice environment. *JAMA* 2005;293:2609–17.
  - 1.1. Hershey N. The defensive practice of medicine: myth or reality. *Milbank Mem Fund Q* 1972;50:69-97. \*
  - 1.2. Klingman D, Localio AR, Sugarman J, et al. Measuring defensive medicine using clinical scenario surveys. *J Health Polit Policy Law*. 1996;21:185-217. \*
  - 1.3. Rosenblatt RA, Detering B. Changing patterns of obstetric practice in Washington State: the impact of tort reform. *Fam Med*. 1988;20:101-107. †
  - 1.4. Grumbach K, Vranizan K, Rennie D, Luft HS. *Charges for Obstetric Liability Insurance and Discontinuation of Obstetric Practice in New York: Report to the Office of Technology Assessment*. Washington, DC: Office of Technology Assessment; 1993. †
2. DeKay LM, Asch DA: Is the use of diagnostic tests good for patients, or bad? *Med Decis Making* 1998, 18:19–28. \*
3. Dalton GD, Samaropoulos XF, Dalton AC: Effect of physician strategies for coping with the US medical malpractice crisis on healthcare delivery and patient access to healthcare. *Public Health* 2008, 122:1051–1060.
  - 3.1. Tancredi LR, Barondess JA. The problem of defensive medicine. *Science*. 1978; 200 (4344): 879–882. PMID: 644329
    - 3.1.1. Report of the Secretary's Commission on Medical Malpractice (DHEW Publ. No. OS-73-89, Department of Health, Education, and Welfare, Washington, D.C., 1973) †
    - 3.1.2. *Duke Law J*. 1971, 939 (1971) †
4. Lysdahl KB, Hofmann BM: What causes increasing and unnecessary use of radiological investigations? a survey of radiologists' perceptions. *BMC Health Serv Res* 2009, 9:155. \*

**Steurer et al. 2009, Switzerland**

5. Studdert DM, Mello MM, Sage WM, et al. Defensive medicine among high-risk specialist physicians in a volatile malpractice environment. *JAMA* 2005;293:2609–17.
  - 5.1. Hershey N. The defensive practice of medicine: myth or reality. *Milbank Mem Fund Q* 1972;50:69-97. \*
  - 5.2. Klingman D, Localio AR, Sugarman J, et al. Measuring defensive medicine using clinical scenario surveys. *J Health Polit Policy Law*. 1996;21:185-217. \*
  - 5.3. Rosenblatt RA, Detering B. Changing patterns of obstetric practice in Washington State: the impact of tort reform. *Fam Med*. 1988;20:101-107. †
  - 5.4. Grumbach K, Vranizan K, Rennie D, Luft HS. *Charges for Obstetric Liability Insurance and Discontinuation of Obstetric Practice in New York: Report to the Office of Technology Assessment*. Washington, DC: Office of Technology Assessment; 1993. †

**Summerton 1995, UK**

1. McQuade JS. The medical malpractice crisis - reflections on the alleged causes and proposed cures: discussion paper. *J R Soc Med* 1991;84:408-11. \*
2. Hershey N. Quoted in McKinlay JB, ed. *Politics and law in health care policy*. New York: Milbank Memorial Fund, 1973. †
3. Dingwall R. Quoted in Hoyte P. *Medical negligence litigation*. *Medical Law Review*. (In press.) †

**Vargas-Blasco et al. 2020, Spain**

1. Sanbar SS, Firestone MH. Reaction of physicians to malpractice litigation (medical malpractice stress syndrome). In: Sanbar SS, editor. *Medical malpractice survival handbook*. Philadelphia, PA: Mosby Elsevier; 2006. †

**Vimercati et al. 2000, Italy**

- No reference.

**Vizcaíno-Rakosnik et al. 2020, Spain**

1. Charles S. The physician and malpractice litigation. *J Med Pract Manage*. 1985;1:123-129. †

**Young et al. 2020, UK**

- No reference.

**Assing Hvidt et al. 2017, Denmark**

1. Pellino IM, Pellino G. Consequences of defensive medicine, second victims, and clinical-judicial syndrome on surgeons' medical practice and on health service. *Updates Surg* 2015;67:331–7.
  - 1.1. McQuade JS. The medical malpractice crisis - reflections on the alleged causes and proposed cures: discussion paper. *J R Soc Med* 1991;84:408-11. \*

- 1.2. US Congress Office of Technology Assessment. *Defensive medicine and medical malpractice*. Washington, DC: US Government Printing Office, 1994. \*
2. US Congress Office of Technology Assessment. *Defensive medicine and medical malpractice*. Washington, DC: US Government Printing Office, 1994. \*
3. Panella M, Rinaldi C, Leigh F, *et al*. Prevalence and costs of defensive medicine: a national survey of Italian physicians. *J Health Serv Res Policy* 2017;211–7.
  - 3.1. US Congress, Office of Technology Assessment. *Defensive medicine and medical malpractice, OTA-H – 602*. Washington, DC: US Government Printing Office, July 1994. \*
  - 3.2. Studdert DM, Mello MM, Sage WM, *et al*. Defensive medicine among high-risk specialist physicians in a volatile malpractice environment. *JAMA* 2005; 293: 2609–2617.
    - 3.2.1. Hershey N. The defensive practice of medicine: myth or reality. *Milbank Mem Fund Q* 1972;50:69-97. \*
    - 3.2.2. Klingman D, Localio AR, Sugarman J, *et al*. Measuring defensive medicine using clinical scenario surveys. *J Health Polit Policy Law*. 1996;21:185-217. \*
    - 3.2.3. Rosenblatt RA, Detering B. Changing patterns of obstetric practice in Washington State: the impact of tort reform. *Fam Med*. 1988;20:101-107. †
    - 3.2.4. Grumbach K, Vranizan K, Rennie D, Luft HS. *Charges for Obstetric Liability Insurance and Discontinuation of Obstetric Practice in New York: Report to the Office of Technology Assessment*. Washington, DC: Office of Technology Assessment; 1993. †
  - 3.3. Kessler DP, Summerton N and Graham JR. Effects of the medical liability system in Australia, the UK, and the USA. *Lancet* 2006; 368: 240–246. \*
  - 3.4. Ortashi O, Virdee J, Hassan R, *et al*. The practice of defensive medicine among hospital doctors in the United Kingdom. *BMC Med Ethics* 2013; 14: 42.
    - 3.4.1. Toker A, Shvarts S, Perry ZH, *et al*: Clinical guidelines, defensive medicine, and the physician between the two. *Am J Otolaryngol* 2004, 25(4):245–250.
      - 3.4.1.1. Van Boven K, Dijksterhuis P, Lamberts H. Defensive testing in Dutch family practice: Is the grass greener on the other side of the ocean? *Journal of Family Practice*. 1997;44(5):468-72. \*
      - 3.4.1.2. Summerton N. Positive and negative factors in defensive medicine: A questionnaire study of general practitioners. *British medical journal*. 1995;310(6971):27-9.
        - 3.4.1.2.1. McQuade JS. The medical malpractice crisis - reflections on the alleged causes and proposed cures: discussion paper. *J R Soc Med* 1991;84:408-11. \*
        - 3.4.1.2.2. Hershey N. Quoted in McKinlay JB, ed. *Politics and law in health care policy*. New York: Milbank Memorial Fund, 1973. †
        - 3.4.1.2.3. Dingwall R. Quoted in Hoyte P. *Medical negligence litigation*. *Medical Law Review*. (In press.) †
      - 3.4.2. Corrigan J, Wagner J, Wolfe L, *et al*: Report from congress medical malpractice reform and defensive medicine. *Cancer Invest* 1996, 14(3):277–284.
        - 3.4.2.1. OTA. Office of Technology Assessment. *Defensive medicine and medical malpractice*. Washington (DC). (Online) Available from: <http://ota.fas.org/reports/9405.pdf>. 1994 (Publication No. OTA-H-602). \*
        - 3.4.3. Summerton N: Trends in negative defensive medicine within general practice. *Br J Gen Pract* 2000, 50:565–566. \*
  - 3.5. Sathiyakumar V, Jahangir AA, Mir HR, *et al*. The prevalence and costs of defensive medicine among orthopaedic trauma surgeons: a national survey study. *J Orthop Trauma* 2013 Oct; 27: 592–597.
    - 3.5.1. US Congress, Office of Technology Assessment. *Defensive medicine and medical malpractice, OTA-H – 602*. Washington, DC: US Government Printing Office, July 1994. \*
    - 3.5.2. Hershey N. The defensive practice of medicine: myth or reality. *Milbank Mem Fund Q* 1972;50:69-97. \*
  - 3.6. Panella M, Leigh F, Rinaldi C, *et al*. Defensive medicine: overview of the literature. *Ig Sanita Pubbl* 2015; 71: 335–351. †
  - 3.7. Asher E, Greenberg-Dotan S, Halevy J, *et al*. Defensive medicine in Israel – a nationwide survey. *PLoS One* 2012; 7: e42613.
    - 3.7.1. US Congress, Office of Technology Assessment. *Defensive medicine and medical malpractice, OTA-H – 602*. Washington, DC: US Government Printing Office, July 1994. \*

4. Studdert DM, Mello MM, Sage WM, *et al.* Defensive medicine among high-risk specialist physicians in a volatile malpractice environment. *JAMA* 2005;293:2609–17.
  - 4.1. Hershey N. The defensive practice of medicine: myth or reality. *Milbank Mem Fund Q* 1972;50:69-97. \*
  - 4.2. Klingman D, Localio AR, Sugarman J, *et al.* Measuring defensive medicine using clinical scenario surveys. *J Health Polit Policy Law*. 1996;21:185-217. \*
  - 4.3. Rosenblatt RA, Detering B. Changing patterns of obstetric practice in Washington State: the impact of tort reform. *Fam Med*. 1988;20:101-107. †
  - 4.4. Grumbach K, Vranizan K, Rennie D, Luft HS. *Charges for Obstetric Liability Insurance and Discontinuation of Obstetric Practice in New York: Report to the Office of Technology Assessment*. Washington, DC: Office of Technology Assessment; 1993. †

#### Assing Hvidt *et al.* 2019, Denmark

1. Gaine WJ (2003) No-fault compensation systems. *British Medical Journal* 326: 997–998. \*
2. Panella M, Rinaldi C, Leigheb F, *et al.* Prevalence and costs of defensive medicine: a national survey of Italian physicians. *J Health Serv Res Policy* 2017:211–7.
  - 2.1. US Congress, Office of Technology Assessment. Defensive medicine and medical malpractice, OTA-H – 6O2. Washington, DC: US Government Printing Office, July 1994. \*
  - 2.2. Studdert DM, Mello MM, Sage WM, *et al.* Defensive medicine among high-risk specialist physicians in a volatile malpractice environment. *JAMA* 2005; 293: 2609–2617.
    - 2.2.1. Hershey N. The defensive practice of medicine: myth or reality. *Milbank Mem Fund Q* 1972;50:69-97. \*
    - 2.2.2. Klingman D, Localio AR, Sugarman J, *et al.* Measuring defensive medicine using clinical scenario surveys. *J Health Polit Policy Law*. 1996;21:185-217. \*
    - 2.2.3. Rosenblatt RA, Detering B. Changing patterns of obstetric practice in Washington State: the impact of tort reform. *Fam Med*. 1988;20:101-107. †
    - 2.2.4. Grumbach K, Vranizan K, Rennie D, Luft HS. *Charges for Obstetric Liability Insurance and Discontinuation of Obstetric Practice in New York: Report to the Office of Technology Assessment*. Washington, DC: Office of Technology Assessment; 1993. †
  - 2.3. Kessler DP, Summerton N and Graham JR. Effects of the medical liability system in Australia, the UK, and the USA. *Lancet* 2006; 368: 240–246. \*
  - 2.4. Ortashi O, Virdee J, Hassan R, *et al.* The practice of defensive medicine among hospital doctors in the United Kingdom. *BMC Med Ethics* 2013; 14: 42.
    - 2.4.1. Toker A, Shvarts S, Perry ZH, *et al.* Clinical guidelines, defensive medicine, and the physician between the two. *Am J Otolaryngol* 2004, 25(4):245–250.
      - 2.4.1.1. Van Boven K, Dijksterhuis P, Lamberts H. Defensive testing in Dutch family practice: Is the grass greener on the other side of the ocean? *Journal of Family Practice*. 1997;44(5):468-72. \*
      - 2.4.1.2. Summerton N. Positive and negative factors in defensive medicine: A questionnaire study of general practitioners. *British medical journal*. 1995;310(6971):27-9.
        - 2.4.1.2.1. McQuade JS. The medical malpractice crisis - reflections on the alleged causes and proposed cures: discussion paper. *J R Soc Med* 1991;84:408-11. \*
        - 2.4.1.2.2. Hershey N. Quoted in McKinlay JB, ed. *Politics and law in health care policy*. New York: Milbank Memorial Fund, 1973. †
        - 2.4.1.2.3. Dingwall R. Quoted in Hoyte P. *Medical negligence litigation*. *Medical Law Review*. (In press.) †
      - 2.4.2. Corrigan J, Wagner J, Wolfe L, *et al.* Report from congress medical malpractice reform and defensive medicine. *Cancer Invest* 1996, 14(3):277–284.
        - 2.4.2.1. OTA. Office of Technology Assessment. Defensive medicine and medical malpractice. Washington (DC). (Online) Available from: <http://ota.fas.org/reports/9405.pdf>. 1994 (Publication No. OTA-H-602). \*
      - 2.4.3. Summerton N: Trends in negative defensive medicine within general practice. *Br J Gen Pract* 2000, 50:565–566. \*

- 2.5. Sathiyakumar V, Jahangir AA, Mir HR, et al. The prevalence and costs of defensive medicine among orthopaedic trauma surgeons: a national survey study. *J Orthop Trauma* 2013 Oct; 27: 592–597.
  - 2.5.1. US Congress, Office of Technology Assessment. Defensive medicine and medical malpractice, OTA-H – 6O2. Washington, DC: US Government Printing Office, July 1994. \*
  - 2.5.2. Hershey N. The defensive practice of medicine: myth or reality. *Milbank Mem Fund Q* 1972;50:69-97. \*
- 2.6. Panella M, Leigh F, Rinaldi C, et al. Defensive medicine: overview of the literature. *Ig Sanita Pubbl* 2015; 71: 335–351. †
- 2.7. Asher E, Greenberg-Dotan S, Halevy J, et al. Defensive medicine in Israel – a nationwide survey. *PLoS One* 2012; 7: e42613.
  - 2.7.1. US Congress, Office of Technology Assessment. Defensive medicine and medical malpractice, OTA-H – 6O2. Washington, DC: US Government Printing Office, July 1994. \*
3. Reschovsky JD and Saiontz-Martinez CB (2018) Malpractice claim fears and the costs of treating Medicare patients: A new approach to estimating the costs of defensive medicine. *Health Services Research* 53: 1498–1516.
  - 3.1. Klingman D, Localio AR, Sugarman J, et al. Measuring defensive medicine using clinical scenario surveys. *J Health Polit Policy Law*. 1996;21:185-217. \*
4. Studdert DM, Mello MM, Sage WM, et al. (2005) Defensive medicine among high-risk specialist physicians in a volatile malpractice environment. *JAMA* 293: 2609–2617.
  - 4.1. Hershey N. The defensive practice of medicine: myth or reality. *Milbank Mem Fund Q* 1972;50:69-97. \*
  - 4.2. Klingman D, Localio AR, Sugarman J, et al. Measuring defensive medicine using clinical scenario surveys. *J Health Polit Policy Law*. 1996;21:185-217. \*
  - 4.3. Rosenblatt RA, Detering B. Changing patterns of obstetric practice in Washington State: the impact of tort reform. *Fam Med*. 1988;20:101-107. †
  - 4.4. Grumbach K, Vranizan K, Rennie D, Luft HS. *Charges for Obstetric Liability Insurance and Discontinuation of Obstetric Practice in New York: Report to the Office of Technology Assessment*. Washington, DC: Office of Technology Assessment; 1993. †
5. US Congress, Office of Technology Assessment (1994) *Defensive Medicine and Medical Malpractice*. Washington, DC: US Government Printing Office. \*

#### **Brilla et al. 2006, Germany and USA**

- No reference.

#### **Calikoglu et al. 2020, Turkey**

1. Congress US. Office of Technology Assessment, Defensive Medicine and Medical Malpractice. U S Government Printing Office; 1994. OTA-H–6O2. Washington, D.C. \*
2. Hershey N. The defensive practice of medicine. Myth or reality. *Milbank Mem Fund Q*. 1972:69–98. \*
3. NCBI. Defensive medicine. MeSH descr data 2019. <https://meshb.nlm.nih.gov/record/ui?ui/4D003675>; 1991. Accessed September 1, 2019. \*
4. Studdert DM, Mello MM, Sage WM, et al. Defensive medicine among high-risk specialist physicians in a volatile malpractice environment. *J Am Med Assoc*. 2005.
  - 4.1. Hershey N. The defensive practice of medicine: myth or reality. *Milbank Mem Fund Q* 1972;50:69-97. \*
  - 4.2. Klingman D, Localio AR, Sugarman J, et al. Measuring defensive medicine using clinical scenario surveys. *J Health Polit Policy Law*. 1996;21:185-217. \*
  - 4.3. Rosenblatt RA, Detering B. Changing patterns of obstetric practice in Washington State: the impact of tort reform. *Fam Med*. 1988;20:101-107. †

- 4.4. Grumbach K, Vranizan K, Rennie D, Luft HS. *Charges for Obstetric Liability Insurance and Discontinuation of Obstetric Practice in New York: Report to the Office of Technology Assessment*. Washington, DC: Office of Technology Assessment; 1993. †

#### Catino et al. 2009, Italy

1. US Congress, Office of Technology Assessment (1994), Defensive medicine and medical malpractice. OTA – H – 602, DC: US Government Printing Office, Washington. \*

#### Elli et al. 2013, Italy

1. Hiyama T, Yoshihara M, Tanaka S, et al. Defensive medicine practices among gastroenterologists in Japan. *World Journal of Gastroenterology* 2006;12:7671–5.
- 1.1. Studdert DM, Mello MM, Sage WM, et al. (2005) Defensive medicine among high-risk specialist physicians in a volatile malpractice environment. *JAMA* 293: 2609–2617.
- 1.1.1. Hershey N. The defensive practice of medicine: myth or reality. *Milbank Mem Fund Q* 1972;50:69-97. \*
- 1.1.2. Klingman D, Localio AR, Sugarman J, et al. Measuring defensive medicine using clinical scenario surveys. *J Health Polit Policy Law*. 1996;21:185-217. \*
- 1.1.3. Rosenblatt RA, Detering B. Changing patterns of obstetric practice in Washington State: the impact of tort reform. *Fam Med*. 1988;20:101-107. †
- 1.1.4. Grumbach K, Vranizan K, Rennie D, Luft HS. *Charges for Obstetric Liability Insurance and Discontinuation of Obstetric Practice in New York: Report to the Office of Technology Assessment*. Washington, DC: Office of Technology Assessment; 1993. †
- 1.2. Summerton N. Positive and negative factors in defensive medicine: a questionnaire study of general practitioners. *British Medical Journal* 1995;310:27–9.
- 1.2.1. McQuade JS. The medical malpractice crisis - reflections on the alleged causes and proposed cures: discussion paper. *J R Soc Med* 1991;84:408-11. \*
- 1.2.2. Hershey N. Quoted in McKinlay JB, ed. *Politics and law in health care policy*. New York: Milbank Memorial Fund, 1973. †
- 1.2.3. Dingwall R. Quoted in Hoyte P. *Medical negligence litigation*. *Medical Law Review*. (In press.) †
2. Hermer LD, Brody H. Defensive medicine, cost containment, and reform. *Journal of General Internal Medicine* 2010;25:470–3.
- 2.1. McQuade JS. The medical malpractice crisis—reflections on the alleged causes and proposed cures: discussion paper. *J R Soc Med*. 1991; 84:408–11. \*
- 2.2. U.S. Congress, Office of Technology Assessment. *Defensive medicine and medical malpractice*. 1994. \*
- 2.3. Passmore K, Leung W-C. Defensive practice among psychiatrists: a questionnaire survey. *Postgrad Med J*. 2002;78:671–3.
- 2.3.1. McQuade JS. The medical malpractice crisis—reflections on the alleged causes and proposed cures: discussion paper. *J R Soc Med* 1991;84:408–11 \*
- 2.3.2. Summerton N. Positive and negative factors in defensive medicine: a questionnaire study of general practitioners. *BMJ* 1995;310:27–9.
- 2.3.2.1. McQuade JS. The medical malpractice crisis - reflections on the alleged causes and proposed cures: discussion paper. *J R Soc Med* 1991;84:408-11. \*
- 2.3.2.2. Hershey N. Quoted in McKinlay JB, ed. *Politics and law in health care policy*. New York: Milbank Memorial Fund, 1973. †
- 2.3.2.3. Dingwall R. Quoted in Hoyte P. *Medical negligence litigation*. *Medical Law Review*. (In press.) †
- 2.4. Summerton N. Positive and negative factors in defensive medicine: a questionnaire study of general practitioners. *BMJ*. 1995;310:27–9.
- 2.4.1. McQuade JS. The medical malpractice crisis - reflections on the alleged causes and proposed cures: discussion paper. *J R Soc Med* 1991;84:408-11. \*
- 2.4.2. Hershey N. Quoted in McKinlay JB, ed. *Politics and law in health care policy*. New York: Milbank Memorial Fund, 1973. †



- 2.4.3. Dingwall R. Quoted in Hoyte P. Medical negligence litigation. *Medical Law Review*. (In press.) †
- 2.5. Chawla A, Gunderman RB. Defensive medicine: prevalence, implications, and recommendations. *Acad Radiol*. 2008;15:948–9. †
- 2.6. Grepperud S. Medical errors: responsibility and informal penalties. *Harvard Health Pol Rev*. 2004;5(1):89–95. †
- 2.7. Dubay L, Kaestner R, Waidmann T. The impact of malpractice fears on cesarean section rates. *J Health Econ*. 1999;18:491–522.
  - 2.7.1. U.S. Senate Subcommittee on Nutrition and Human Needs, 1969. *Medical Malpractice: The patient versus the Physician*. Committee Print, 91<sup>st</sup> Congress, 1<sup>st</sup> Session, U.S. Government Printing Office, Washington DC. †
  - 2.7.2. Marieskind, H.I., 1979. An evaluation of cesarean section in the United States. Final Report submitted to the Department of Health, Education, and Welfare, Office of the Assistant Secretary for Planning and Evaluation/Health. †
- 2.8. Studdert DM, Mello MM, Sage WM, et al. Defensive medicine among high-risk specialist physicians in a volatile malpractice environment. *JAMA*. 2005;293(21):2609–17.
  - 2.8.1. Hershey N. The defensive practice of medicine: myth or reality. *Milbank Mem Fund Q* 1972;50:69-97. \*
  - 2.8.2. Klingman D, Localio AR, Sugarman J, et al. Measuring defensive medicine using clinical scenario surveys. *J Health Polit Policy Law*. 1996;21:185-217. \*
  - 2.8.3. Rosenblatt RA, Detering B. Changing patterns of obstetric practice in Washington State: the impact of tort reform. *Fam Med*. 1988;20:101-107. †
  - 2.8.4. Grumbach K, Vranizan K, Rennie D, Luft HS. *Charges for Obstetric Liability Insurance and Discontinuation of Obstetric Practice in New York: Report to the Office of Technology Assessment*. Washington, DC: Office of Technology Assessment; 1993. †
- 2.9. Sloan FA, Shadle JH. Is there empirical evidence for “defensive medicine”? A reassessment. *J Health Econ*. 2009;28:481–91.
  - 2.9.1. US Congress, Office of Technology Assessment (1994), *Defensive medicine and medical malpractice*. OTA – H – 602, DC: US Government Printing Office, Washington. \*
  - 2.9.2. Sloan, F.A., Chepke, L.M., 2008. *Medical Malpractice*. MIT Press, Cambridge, MA. †
3. Summerton N. Positive and negative factors in defensive medicine: a questionnaire study of general practitioners. *British Medical Journal* 1995;310:27–9.
  - 3.1. McQuade JS. The medical malpractice crisis - reflections on the alleged causes and proposed cures: discussion paper. *J R Soc Med* 1991;84:408-11. \*
  - 3.2. Hershey N. Quoted in McKinlay JB, ed. *Politics and law in health care policy*. New York: Milbank Memorial Fund, 1973. †
  - 3.3. Dingwall R. Quoted in Hoyte P. Medical negligence litigation. *Medical Law Review*. (In press.) †

### Kucuk 2018, Turkey

1. Asher E, Dvir S, Seidman DS, Greenberg-Dotan S, Kedem A, Sheizaf B, et al. 2013. Defensive medicine among obstetricians and gynecologists in tertiary hospitals. *PLoS One* 8:e57108.
  - 1.1. Anderson RE (1999) Billions for defense: the pervasive nature of defensive medicine. *Arch Intern Med* 159: 2399-2402.
    - 1.1.1. US Congress, Office of Technology Assessment (1994), *Defensive medicine and medical malpractice*. OTA – H – 602, DC: US Government Printing Office, Washington. \*
2. Sekhar MS, Vyas N. 2013. Defensive medicine: a bane to healthcare. *Annals of Medical and Health Sciences Research* 3:295–296.
  - 2.1. Turley LA. The Hippocratic Oath. *JAMA*. 1939;113:2442–3. †
  - 2.1. Kessler D, McClellan M. Do doctors practice defensive medicine? *Q J Econ*. 1996; 111 (2): 353–390. †



**Lindenthal et al. 1999, The Netherlands and USA**

- No reference.

**Motta et al. 2015, Italy**

1. US Congress, Office of Technology Assessment (1994), Defensive medicine and medical malpractice. Publication OTA-H-602. US Government Printing Office, Washington, DC \*

**Müller et al. 2020, Germany**

1. Sorum PC, Shim J, Chasseigne G, Bonnin-Scaon S, Cogneau J, Mullet E. Why do primary care physicians in the United States and France order prostate-specific antigen tests for asymptomatic patients? *Med Decis Mak.* 2003;23: 301–13. \*

**Olcay et al. 2017, Turkey**

1. Vandersteegen T, Marnette W, Vandijck D. Defensive medicine: implications for clinical practice, patients and healthcare policy. *Acta Clin Belg* 2015;70:396–7.
  - 1.1. OTA Office of Technology Assessment. Defensive medicine and medical malpractice. Washington, DC: US Government Printing Office; 1994. \*
  - 1.2. Vandijck D, Bergs J. The WHO surgical safety checklist: an innovative or an irrelevant tool? *Acta Chir Belg.* 2014; 114(4): 225–27. \*
2. Mello MM, Chandra A, Gawande AA, Studdert DM. National costs of the medical liability system. *Health Aff (Millwood)* 2010;29:1569–77.
  - 2.1. US Congress, Office of Technology Assessment (1994), Defensive medicine and medical malpractice. Publication OTA-H-602. US Government Printing Office, Washington, DC \*
3. Cunningham W, Wilson H. Complaints, shame and defensive medicine. *BMJ Qual Saf* 2011;20:449–52.
  - 3.1. Studdert DM, Mello MM, Brennan TA. Defensive medicine and tort reform: a wide view. *J Gen Intern Med* 2010;25:380e1.
    - 3.1.1. Mello MM, Brennan TA. Deterrence of medical errors: theory and evidence for malpractice reform. *Texas Law Rev.* 2002;80:1595-637.
      - 3.1.1.1. OFFICE OF TECHNOLOGY ASSESSMENT, 103D CONG., IMPACT OF LEGAL REFORMS ON MEDICAL MALPRACTICE COSTS 6 (1993) [hereinafter IMPACT OF LEGAL REFORMS] (internal citation omitted). \*
      - 3.1.1.2. OFFICE OF TECHNOLOGY ASSESSMENT, 103D CONG., DEFENSIVE MEDICINE AND MEDICAL MALPRACTICE 22 (1994) [hereinafter DEFENSIVE MEDICINE]. \*
    - 3.1.2. Kessler DP, McClellan MB. How liability law affects medical productivity. *J Health Econ* 2002;21:931e55.
      - 3.2.1. Dubay, L., Kaestner, R., Waidmann, T.: The impact of malpractice fears on cesarean section rates. *J. Health Econ.* 18, 491–522 (1999)
        - 3.2.1.1. U.S. Senate Subcommittee on Nutrition and Human Needs, 1969. Medical Malpractice: The patient versus the Physician. Committee Print, 91<sup>st</sup> Congress, 1<sup>st</sup> Session, U.S. Government Printing Office, Washington DC. †
        - 3.2.1.2. Marieskind, H.I., 1979. An evaluation of cesarean section in the United States. Final Report submitted to the Department of Health, Education, and Welfare, Office of the Assistant Secretary for Planning and Evaluation/Health. †
      - 3.2.2. Kessler, D., McClellan, M., 1996. Do doctors practice defensive medicine? *Quarterly Journal of Economics* 111, 353-390. †

- 3.2.3. Kessler, D., McClellan, M., 2000. Malpractice law and health care reforms: optimal liability policy in an era of managed care. NBER WP 7537. †
- 3.3. Cunningham W, Dovey S. Defensive changes in medical practice and the complaints process: a qualitative study of New Zealand doctors. *N Z Med J* 2006;119:1244.
  - 3.3.1. Dewar M. Defensive medicine: It may not be what you think. *Fam Med.* 1994;26:36-8. †
  - 3.3.2. Kessler DP, McClellan MB. How liability law affects medical productivity. *J Health Econ* 2002;21:931e55.
    - 3.3.2.1. Dubay, L., Kaestner, R., Waidmann, T.: The impact of malpractice fears on cesarean section rates. *J. Health Econ.* 18, 491–522 (1999)
      - 3.3.2.1.1. U.S. Senate Subcommittee on Nutrition and Human Needs, 1969. Medical Malpractice: The patient versus the Physician. Committee Print, 91<sup>st</sup> Congress, 1<sup>st</sup> Session, U.S. Government Printing Office, Washington DC. †
      - 3.3.2.1.2. Marieskind, H.I., 1979. An evaluation of cesarean section in the United States. Final Report submitted to the Department of Health, Education, and Welfare, Office of the Assistant Secretary for Planning and Evaluation/Health. †
    - 3.3.2.2. Kessler, D., McClellan, M., 1996. Do doctors practice defensive medicine? *Quarterly Journal of Economics* 111, 353-390. †
    - 3.3.2.3. Kessler, D., McClellan, M., 2000. Malpractice law and health care reforms: optimal liability policy in an era of managed care. NBER WP 7537. †
  - 3.3.3. Studdert DM, Mello MM, Sage WM, et al. Defensive medicine among high-risk specialist physicians in a volatile malpractice environment. *JAMA* 2005; 293: 2609–2617.
    - 3.3.3.1. Hershey N. The defensive practice of medicine: myth or reality. *Milbank Mem Fund Q* 1972;50:69-97. \*
    - 3.3.3.2. Klingman D, Localio AR, Sugarman J, et al. Measuring defensive medicine using clinical scenario surveys. *J Health Polit Policy Law.* 1996;21:185-217. \*
    - 3.3.3.3. Rosenblatt RA, Detering B. Changing patterns of obstetric practice in Washington State: the impact of tort reform. *Fam Med.* 1988;20:101-107. †
    - 3.3.3.4. Grumbach K, Vranizan K, Rennie D, Luft HS. *Charges for Obstetric Liability Insurance and Discontinuation of Obstetric Practice in New York: Report to the Office of Technology Assessment.* Washington, DC: Office of Technology Assessment; 1993. †
4. Feess E. Malpractice liability, technology choice and negative defensive medicine. *Eur J Health Econ* 2012;13:157–67.
- 3.5. Dubay, L., Kaestner, R., Waidmann, T.: The impact of malpractice fears on cesarean section rates. *J. Health Econ.* 18, 491–522 (1999)
  - 3.5.1. U.S. Senate Subcommittee on Nutrition and Human Needs, 1969. Medical Malpractice: The patient versus the Physician. Committee Print, 91<sup>st</sup> Congress, 1<sup>st</sup> Session, U.S. Government Printing Office, Washington DC. †
  - 3.5.2. Marieskind, H.I., 1979. An evaluation of cesarean section in the United States. Final Report submitted to the Department of Health, Education, and Welfare, Office of the Assistant Secretary for Planning and Evaluation/Health. †
- 3.6. Kessler, D.P., McClellan, M.B.: How liability law affects medical productivity. *J. Health Econ.* 21, 931–955 (2002)
  - 3.6.1. Dubay, L., Kaestner, R., Waidmann, T.: The impact of malpractice fears on cesarean section rates. *J. Health Econ.* 18, 491–522 (1999)
    - 3.6.1.1. U.S. Senate Subcommittee on Nutrition and Human Needs, 1969. Medical Malpractice: The patient versus the Physician. Committee Print, 91<sup>st</sup> Congress, 1<sup>st</sup> Session, U.S. Government Printing Office, Washington DC. †
    - 3.6.1.2. Marieskind, H.I., 1979. An evaluation of cesarean section in the United States. Final Report submitted to the Department of Health, Education, and Welfare, Office of the Assistant Secretary for Planning and Evaluation/Health. †
  - 3.6.2. Kessler, D., McClellan, M., 1996. Do doctors practice defensive medicine? *Quarterly Journal of Economics* 111, 353-390. †

- 3.6.3. Kessler, D., McClellan, M., 2000. Malpractice law and health care reforms: optimal liability policy in an era of managed care. NBER WP 7537. †
- 3.7. Localio, A.R., Lawthers, A.G., Bengtson, J.M., Hebert, L.E., Weaver, S.L., Brennan, T.A. et al.: Relationship between malpractice claims and cesarean delivery. *J. Am. Med. Assoc.* 269(3), 366–373 (1993)
- 3.7.1. Danforth DN. Cesarean section. *JAMA.* 1985; 253:811-818. \*
- 3.7.2. Sachs BP. Is the rising rate of cesarean sections a result of more defensive medicine? In: Rostow VP, Bulger RJ, eds. *Medical Professional Liability and the Delivery of Obstetrical Care.* Washington, DC: National Academy Press; 1989:27-40. †
- 3.7.3. Shiono PH, Fielden JG, McNellis D, Rhoads GG, Pearse WH. Recent trends in cesarean birth and trial of labor rates in the United States. *JAMA.* 1987;257:494-497. \*
- 3.7.4. The Impact of Randomized Clinical Trials on Health Policy and Medical Practice: Background Paper. Washington, DC: US Congress, Office of Technology Assessment; 1983:13. OTA-BP-H-22. \*

#### **Osorio et al. 2020, Spain**

1. Perry Udem Research/Communication. Unnecessary tests and procedures in the health care system physicians say unnecessary tests and procedures are a serious problem, and feel a responsibility to address the issue. 2014. (Accessed 04/01/2018.) Available at: <http://www.choosingwisely.org/wp-content/uploads/2015/04/Final-Choosing-Wisely-Survey-Report.pdf> \*
2. Zambrana-García JL, Lozano Rodríguez-Mancheño A. [Physicians' attitudes toward the problem of unnecessary tests and procedures]. *Gac Sanit.* 2016;30:485–6. \*
3. Domino J, McGovern C, Chang KWC, et al. Lack of physician-patient communication as a key factor associated with malpractice litigation in neonatal brachial plexus palsy. *J Neurosurg Pediatr.* 2014;13:238–42. \*

#### **Osti et al. 2015, Austria**

1. Nahed, B. V., Babu, M. A., Smith, T. R. & Heary, R. F. (2012) Malpractice liability and defensive medicine: a national survey of neurosurgeons. *PLoS ONE*, 7 (6), e39237. \*
2. Catino, M. (2011) Why do doctors practice defensive medicine? The side-effects of medical litigation. *Safety Science Monitor*, 15 (1), 1–12. \*

#### **Panella et al 2016, Italy**

1. U.S. Congress, Office of Technology Assessment. *Defensive medicine and medical malpractice, OTA-H-602.* Washington, DC: U.S. Government Printing Office; 1994. \*
2. Studdert DM, Mello MM, Sage WM, DesRoches CM, Peugh J, Zapert K, et al. Defensive medicine among high-risk specialist physicians in a volatile malpractice environment. *JAMA.* 2005;293:2609-17.
  - 2.1. Hershey N. The defensive practice of medicine: myth or reality. *Milbank Mem Fund Q* 1972;50:69-97. \*
  - 2.2. Klingman D, Localio AR, Sugarman J, et al. Measuring defensive medicine using clinical scenario surveys. *J Health Polit Policy Law.* 1996;21:185-217. \*
  - 2.3. Rosenblatt RA, Detering B. Changing patterns of obstetric practice in Washington State: the impact of tort reform. *Fam Med.* 1988;20:101-107. †

- 2.4. Grumbach K, Vranizan K, Rennie D, Luft HS. *Charges for Obstetric Liability Insurance and Discontinuation of Obstetric Practice in New York: Report to the Office of Technology Assessment*. Washington, DC: Office of Technology Assessment; 1993. †
3. Kessler DP, Summerton N, Graham JR. Effects of the medical liability system in Australia, the UK, and the USA. *Lancet*. 2006;368:240-6. \*
4. Ortashi O, Virdee J, Hassan R, Mutrynowski T, Abu-Zidan F. The practice of defensive medicine among hospital doctors in the United Kingdom. *BMC Med Ethics*. 2013;14:42,
  - 4.1. Toker A, Shvarts S, Perry ZH, et al: Clinical guidelines, defensive medicine, and the physician between the two. *Am J Otolaryngol* 2004, 25(4):245–250.
    - 4.1.1. Van Boven K, Dijksterhuis P, Lamberts H. Defensive testing in Dutch family practice: Is the grass greener on the other side of the ocean? *Journal of Family Practice*. 1997;44(5):468-72. \*
    - 4.1.2. Summerton N. Positive and negative factors in defensive medicine: A questionnaire study of general practitioners. *British medical journal*. 1995;310(6971):27-9.
      - 4.1.2.1. McQuade JS. The medical malpractice crisis - reflections on the alleged causes and proposed cures: discussion paper. *J R Soc Med* 1991;84:408-11. \*
      - 4.1.2.2. Hershey N. Quoted in McKinlay JB, ed. *Politics and law in health care policy*. New York: Milbank Memorial Fund, 1973. †
      - 4.1.2.3. Dingwall R. Quoted in Hoyte P. *Medical negligence litigation*. *Medical Law Review*. (In press.) †
    - 4.2. Corrigan J, Wagner J, Wolfe L, et al: Report from congress medical malpractice reform and defensive medicine. *Cancer Invest* 1996, 14(3):277–284.
      - 4.2.1. OTA. Office of Technology Assessment. Defensive medicine and medical malpractice. Washington (DC). (Online) Available from: <http://ota.fas.org/reports/9405.pdf>. 1994 (Publication No. OTA-H-602). \*
    - 4.3. Summerton N: Trends in negative defensive medicine within general practice. *Br J Gen Pract* 2000, 50:565–566. \*

#### **Panella et al. 2017, Italy**

1. US Congress, Office of Technology Assessment. Defensive medicine and medical malpractice, OTA-H – 602. Washington, DC: US Government Printing Office, July 1994. \*
2. Studdert DM, Mello MM, Sage WM, et al. Defensive medicine among high-risk specialist physicians in a volatile malpractice environment. *JAMA* 2005; 293: 2609–2617.
  - 2.1. Hershey N. The defensive practice of medicine: myth or reality. *Milbank Mem Fund Q* 1972;50:69-97. \*
  - 2.2. Klingman D, Localio AR, Sugarman J, et al. Measuring defensive medicine using clinical scenario surveys. *J Health Polit Policy Law*. 1996;21:185-217. \*
  - 2.3. Rosenblatt RA, Detering B. Changing patterns of obstetric practice in Washington State: the impact of tort reform. *Fam Med*. 1988;20:101-107. †
  - 2.4. Grumbach K, Vranizan K, Rennie D, Luft HS. *Charges for Obstetric Liability Insurance and Discontinuation of Obstetric Practice in New York: Report to the Office of Technology Assessment*. Washington, DC: Office of Technology Assessment; 1993. †
3. Kessler DP, Summerton N and Graham JR. Effects of the medical liability system in Australia, the UK, and the USA. *Lancet* 2006; 368: 240–246. \*
4. Ortashi O, Virdee J, Hassan R, et al. The practice of defensive medicine among hospital doctors in the United Kingdom. *BMC Med Ethics* 2013; 14: 42.
  - 4.1. Toker A, Shvarts S, Perry ZH, et al: Clinical guidelines, defensive medicine, and the physician between the two. *Am J Otolaryngol* 2004, 25(4):245–250.
    - 4.1.1. Van Boven K, Dijksterhuis P, Lamberts H. Defensive testing in Dutch family practice: Is the grass greener on the other side of the ocean? *Journal of Family Practice*. 1997;44(5):468-72. \*
    - 4.1.2. Summerton N. Positive and negative factors in defensive medicine: A questionnaire study of general practitioners. *British medical journal*. 1995;310(6971):27-9.

- 4.1.2.1. McQuade JS. The medical malpractice crisis - reflections on the alleged causes and proposed cures: discussion paper. *J R Soc Med* 1991;84:408-11. \*
- 4.1.2.2. Hershey N. Quoted in McKinlay JB, ed. *Politics and law in health care policy*. New York: Milbank Memorial Fund, 1973. †
- 4.1.2.3. Dingwall R. Quoted in Hoyte P. *Medical negligence litigation*. *Medical Law Review*. (In press.) †
- 4.2. Corrigan J, Wagner J, Wolfe L, et al: Report from congress medical malpractice reform and defensive medicine. *Cancer Invest* 1996, 14(3):277–284.
  - 4.2.1. OTA. Office of Technology Assessment. *Defensive medicine and medical malpractice*. Washington (DC). (Online) Available from: <http://ota.fas.org/reports/9405.pdf>. 1994 (Publication No. OTA-H-602). \*
  - 4.3. Summerton N: Trends in negative defensive medicine within general practice. *Br J Gen Pract* 2000, 50:565–566. \*
5. Sathiyakumar V, Jahangir AA, Mir HR, et al. The prevalence and costs of defensive medicine among orthopaedic trauma surgeons: a national survey study. *J Orthop Trauma* 2013 Oct; 27: 592–597.
  - 5.1. US Congress, Office of Technology Assessment. *Defensive medicine and medical malpractice, OTA-H – 602*. Washington, DC: US Government Printing Office, July 1994. \*
  - 5.2. Hershey N. *The defensive practice of medicine: myth or reality*. *Milbank Mem Fund Q* 1972;50:69-97. \*
6. Panella M, Leigheb F, Rinaldi C, et al. *Defensive medicine: overview of the literature*. *Ig Sanita Pubbl* 2015; 71: 335–351. †
7. Asher E, Greenberg-Dotan S, Halevy J, et al. *Defensive medicine in Israel – a nationwide survey*. *PLoS One* 2012; 7: e42613.
  - 7.1. US Congress, Office of Technology Assessment. *Defensive medicine and medical malpractice, OTA-H – 602*. Washington, DC: US Government Printing Office, July 1994. \*

**Passmore et al. 2002, UK**

1. McQuade JS. The medical malpractice crisis—reflections on the alleged causes and proposed cures: discussion paper. *J R Soc Med* 1991;84:408–11 \*
2. Summerton N. Positive and negative factors in defensive medicine: a questionnaire study of general practitioners. *BMJ* 1995;310:27–9.
  - 2.1. McQuade JS. The medical malpractice crisis - reflections on the alleged causes and proposed cures: discussion paper. *J R Soc Med* 1991;84:408-11. \*
  - 2.2. Hershey N. Quoted in McKinlay JB, ed. *Politics and law in health care policy*. New York: Milbank Memorial Fund, 1973. †
  - 2.3. Dingwall R. Quoted in Hoyte P. *Medical negligence litigation*. *Medical Law Review*. (In press.) †

**Ramella et al. 2015, Italy**

1. US Congress; Office of Technology Assessment (1994). *Defensive medicine and medical malpractice*. US Government Printing Office, Washington, DC (publication OTA-H-602) \*
2. Hershey N (1972) *The defensive practice of medicine: myth or reality*. *Milbank Mem Fund Q* 50:69–98 \*

**Rohacek et al 2012, Switzerland**

1. Hermer LD, Brody H (2010) *Defensive medicine, cost containment, and reform*. *J Gen Intern Med* 25:470–473
  - 1.1. McQuade JS. The medical malpractice crisis—reflections on the alleged causes and proposed cures: discussion paper. *J R Soc Med*. 1991; 84:408–11. \*
  - 1.2. U.S. Congress, Office of Technology Assessment. *Defensive medicine and medical malpractice*. 1994. \*

- 1.3. Passmore K, Leung W-C. Defensive practice among psychiatrists: a questionnaire survey. *Postgrad Med J.* 2002;78:671–3.
  - 1.3.1. McQuade JS. The medical malpractice crisis—reflections on the alleged causes and proposed cures: discussion paper. *J R Soc Med* 1991;84:408–11. \*
  - 1.3.2. Summerton N. Positive and negative factors in defensive medicine: a questionnaire study of general practitioners. *BMJ* 1995;310:27–9.
    - 1.3.2.1. McQuade JS. The medical malpractice crisis - reflections on the alleged causes and proposed cures: discussion paper. *J R Soc Med* 1991;84:408-11. \*
    - 1.3.2.2. Hershey N. Quoted in McKinlay JB, ed. *Politics and law in health care policy*. New York: Milbank Memorial Fund, 1973. †
    - 1.3.2.3. Dingwall R. Quoted in Hoyte P. *Medical negligence litigation*. *Medical Law Review*. (In press.) †
- 1.4. Summerton N. Positive and negative factors in defensive medicine: a questionnaire study of general practitioners. *BMJ.* 1995;310:27–9.
  - 1.4.1. McQuade JS. The medical malpractice crisis - reflections on the alleged causes and proposed cures: discussion paper. *J R Soc Med* 1991;84:408-11. \*
  - 1.4.2. Hershey N. Quoted in McKinlay JB, ed. *Politics and law in health care policy*. New York: Milbank Memorial Fund, 1973. †
  - 1.4.3. Dingwall R. Quoted in Hoyte P. *Medical negligence litigation*. *Medical Law Review*. (In press.) †
- 1.5. Chawla A, Gunderman RB. Defensive medicine: prevalence, implications, and recommendations. *Acad Radiol.* 2008;15:948–9. †
- 1.6. Grepperud S. Medical errors: responsibility and informal penalties. *Harvard Health Pol Rev.* 2004;5(1):89–95. †
- 1.7. Dubay L, Kaestner R, Waidmann T. The impact of malpractice fears on cesarean section rates. *J Health Econ.* 1999;18:491–522.
  - 1.7.1. U.S. Senate Subcommittee on Nutrition and Human Needs, 1969. *Medical Malpractice: The patient versus the Physician*. Committee Print, 91<sup>st</sup> Congress, 1<sup>st</sup> Session, U.S. Government Printing Office, Washington DC. †
  - 1.7.2. Marieskind, H.I., 1979. An evaluation of cesarean section in the United States. Final Report submitted to the Department of Health, Education, and Welfare, Office of the Assistant Secretary for Planning and Evaluation/Health. †
- 1.8. Studdert DM, Mello MM, Sage WM, et al. Defensive medicine among high-risk specialist physicians in a volatile malpractice environment. *JAMA.* 2005;293(21):2609–17.
  - 1.8.1. Hershey N. The defensive practice of medicine: myth or reality. *Milbank Mem Fund Q* 1972;50:69-97. \*
  - 1.8.2. Klingman D, Localio AR, Sugarman J, et al. Measuring defensive medicine using clinical scenario surveys. *J Health Polit Policy Law.* 1996;21:185-217. \*
  - 1.8.3. Rosenblatt RA, Detering B. Changing patterns of obstetric practice in Washington State: the impact of tort reform. *Fam Med.* 1988;20:101-107. †
  - 1.8.4. Grumbach K, Vranizan K, Rennie D, Luft HS. *Charges for Obstetric Liability Insurance and Discontinuation of Obstetric Practice in New York: Report to the Office of Technology Assessment*. Washington, DC: Office of Technology Assessment; 1993. †
- 1.9. Sloan FA, Shadle JH. Is there empirical evidence for “defensive medicine”? A reassessment. *J Health Econ.* 2009;28:481–91.
  - 1.9.1. US Congress, Office of Technology Assessment (1994), *Defensive medicine and medical malpractice*. OTA – H – 602, DC: US Government Printing Office, Washington. \*
  - 1.9.2. Sloan, F.A., Chepke, L.M., 2008. *Medical Malpractice*. MIT Press, Cambridge, MA. †

**Solaroglu et al. 2014, Turkey**

1. Sathiyakumar V, Jahangir AA, Mir HR, Obremsky WT, Lee YM, et al. (2013) The prevalence and costs of defensive medicine among orthopaedic trauma surgeons: A national survey study. *J Orthop Trauma* 27: 592–597.

- 1.1. US Congress, Office of Technology Assessment. Defensive medicine and medical malpractice, OTA-H – 602. Washington, DC: US Government Printing Office, July 1994. \*
- 1.2. Hershey N. The defensive practice of medicine: myth or reality. *Milbank Mem Fund Q* 1972;50:69-97. \*
2. Cunningham W, Wilson H (2011) Complaints, shame and defensive medicine. *BMJ Qual Saf* 20: 449–452.
  - 2.1. Studdert DM, Mello MM, Brennan TA. Defensive medicine and tort reform: a wide view. *J Gen Intern Med* 2010;25:380e1.
    - 2.1.1. Mello MM, Brennan TA. Deterrence of medical errors: theory and evidence for malpractice reform. *Texas Law Rev.* 2002;80:1595-637.
      - 2.1.1.1. OFFICE OF TECHNOLOGY ASSESSMENT, 103D CONG., IMPACT OF LEGAL REFORMS ON MEDICAL MALPRACTICE COSTS 6 (1993) [hereinafter IMPACT OF LEGAL REFORMS] (internal citation omitted). \*
      - 2.1.1.2. OFFICE OF TECHNOLOGY ASSESSMENT, 103D CONG., DEFENSIVE MEDICINE AND MEDICAL MALPRACTICE 22 (1994) [hereinafter DEFENSIVE MEDICINE]. \*
    - 2.2. Kessler DP, McClellan MB. How liability law affects medical productivity. *J Health Econ* 2002;21:931e55.
      - 2.2.1. Dubay, L., Kaestner, R., Waidmann, T.: The impact of malpractice fears on cesarean section rates. *J. Health Econ.* 18, 491–522 (1999)
        - 2.2.1.1. U.S. Senate Subcommittee on Nutrition and Human Needs, 1969. Medical Malpractice: The patient versus the Physician. Committee Print, 91<sup>st</sup> Congress, 1<sup>st</sup> Session, U.S. Government Printing Office, Washington DC. †
        - 2.2.1.2. Marieskind, H.I., 1979. An evaluation of cesarean section in the United States. Final Report submitted to the Department of Health, Education, and Welfare, Office of the Assistant Secretary for Planning and Evaluation/Health. †
      - 2.2.2. Kessler, D., McClellan, M., 1996. Do doctors practice defensive medicine? *Quarterly Journal of Economics* 111, 353-390. †
      - 2.2.3. Kessler, D., McClellan, M., 2000. Malpractice law and health care reforms: optimal liability policy in an era of managed care. NBER WP 7537. †
    - 2.3. Cunningham W, Dovey S. Defensive changes in medical practice and the complaints process: a qualitative study of New Zealand doctors. *N Z Med J* 2006;119:1244.
      - 2.3.1. Dewar M. Defensive medicine: It may not be what you think. *Fam Med.* 1994;26:36-8. †
      - 2.3.2. Kessler DP, McClellan MB. How liability law affects medical productivity. *J Health Econ* 2002;21:931e55.
        - 2.3.2.1. Dubay, L., Kaestner, R., Waidmann, T.: The impact of malpractice fears on cesarean section rates. *J. Health Econ.* 18, 491–522 (1999)
          - 2.3.2.1.1. U.S. Senate Subcommittee on Nutrition and Human Needs, 1969. Medical Malpractice: The patient versus the Physician. Committee Print, 91<sup>st</sup> Congress, 1<sup>st</sup> Session, U.S. Government Printing Office, Washington DC. †
          - 2.3.2.1.2. Marieskind, H.I., 1979. An evaluation of cesarean section in the United States. Final Report submitted to the Department of Health, Education, and Welfare, Office of the Assistant Secretary for Planning and Evaluation/Health. †
        - 2.3.2.2. Kessler, D., McClellan, M., 1996. Do doctors practice defensive medicine? *Quarterly Journal of Economics* 111, 353-390. †
        - 2.3.2.3. Kessler, D., McClellan, M., 2000. Malpractice law and health care reforms: optimal liability policy in an era of managed care. NBER WP 7537. †
      - 2.3.3. Studdert DM, Mello MM, Sage WM, et al. Defensive medicine among high-risk specialist physicians in a volatile malpractice environment. *JAMA* 2005; 293: 2609–2617.
        - 2.3.3.1. Hershey N. The defensive practice of medicine: myth or reality. *Milbank Mem Fund Q* 1972;50:69-97. \*
        - 2.3.3.2. Klingman D, Localio AR, Sugarman J, et al. Measuring defensive medicine using clinical scenario surveys. *J Health Polit Policy Law.* 1996;21:185-217. \*



- 2.3.3.3. Rosenblatt RA, Detering B. Changing patterns of obstetric practice in Washington State: the impact of tort reform. *Fam Med*. 1988;20:101-107. †
- 2.3.3.4. Grumbach K, Vranizan K, Rennie D, Luft HS. *Charges for Obstetric Liability Insurance and Discontinuation of Obstetric Practice in New York: Report to the Office of Technology Assessment*. Washington, DC: Office of Technology Assessment; 1993. †
3. Feess E (2012) Malpractice liability, technology choice and negative defensive medicine. *Eur J Health Econ* 13: 157–167.
- 3.1. Dubai, L., Kaestner, R., Waidmann, T.: The impact of malpractice fears on cesarean section rates. *J. Health Econ*. 18, 491–522 (1999)
- 3.1.1. U.S. Senate Subcommittee on Nutrition and Human Needs, 1969. *Medical Malpractice: The patient versus the Physician*. Committee Print, 91<sup>st</sup> Congress, 1<sup>st</sup> Session, U.S. Government Printing Office, Washington DC. †
- 3.1.2. Marieskind, H.I., 1979. An evaluation of cesarean section in the United States. Final Report submitted to the Department of Health, Education, and Welfare, Office of the Assistant Secretary for Planning and Evaluation/Health. †
- 3.2. Kessler, D.P., McClellan, M.B.: How liability law affects medical productivity. *J. Health Econ*. 21, 931–955 (2002)
- 3.2.1. Dubai, L., Kaestner, R., Waidmann, T.: The impact of malpractice fears on cesarean section rates. *J. Health Econ*. 18, 491–522 (1999)
- 3.2.1.1. U.S. Senate Subcommittee on Nutrition and Human Needs, 1969. *Medical Malpractice: The patient versus the Physician*. Committee Print, 91<sup>st</sup> Congress, 1<sup>st</sup> Session, U.S. Government Printing Office, Washington DC. †
- 3.2.1.2. Marieskind, H.I., 1979. An evaluation of cesarean section in the United States. Final Report submitted to the Department of Health, Education, and Welfare, Office of the Assistant Secretary for Planning and Evaluation/Health. †
- 3.2.2. Kessler, D., McClellan, M., 1996. Do doctors practice defensive medicine? *Quarterly Journal of Economics* 111, 353-390. †
- 3.2.3. Kessler, D., McClellan, M., 2000. Malpractice law and health care reforms: optimal liability policy in an era of managed care. NBER WP 7537. †
- 3.3. Localio, A.R., Lawthers, A.G., Bengtson, J.M., Hebert, L.E., Weaver, S.L., Brennan, T.A. et al.: Relationship between malpractice claims and cesarean delivery. *J. Am. Med. Assoc.* 269(3), 366–373 (1993)
- 3.3.1. Danforth DN. Cesarean section. *JAMA*. 1985; 253:811-818. \*
- 3.3.2. Sachs BP. Is the rising rate of cesarean sections a result of more defensive medicine? In: Rostow VP, Bulger RJ, eds. *Medical Professional Liability and the Delivery of Obstetrical Care*. Washington, DC: National Academy Press; 1989:27-40. †
- 3.3.3. Shiono PH, Fielden JG, McNellis D, Rhoads GG, Pearse WH. Recent trends in cesarean birth and trial of labor rates in the United States. *JAMA*. 1987;257:494-497. \*
- 3.3.4. The Impact of Randomized Clinical Trials on Health Policy and Medical Practice: Background Paper. Washington, DC: US Congress, Office of Technology Assessment; 1983:13. OTA-BP-H-22. \*

**Summerton 2000, UK**

- No reference.

**Symon 2000, UK and Scotland**

*Litigation and defensive clinical practice: quantifying the problem*

1. Black N 1990 Medical litigation and the quality of care. *Lancet* 335: 35±37 \*
2. Ennis M, Clark A, Grudzinskas J 1991 Change in obstetric practice in response to fear of litigation in the British Isles. *Lancet* 338: 616±618 \*
3. Simmons S 1990 Compensation for damage at birth (letter). *The Times*, 13.12.90 †

**Symon 2000, UK and Scotland***Litigation and changes in professional behaviour: a qualitative appraisal*

- No reference.

**Tanriverdi et al. 2015, Turkey**

1. Baicker K, Fisher S, Chandra A. Malpractice liability costs and the practice of medicine in the medicare program. *Health Aff (Millwood)*. 2007;26:841–52. †
2. Kessler DP, Sage WM, Becker DJ. Impact of malpractice reform on the supply of physician services. *J Am Med Assoc*. 2005;293:2618–25.
  - 2.1. Kessler DP, McClellan MB. Do doctors practice defensive medicine? *Q J Econ*. 1996;111:353-390. †
  - 2.2. Kessler DP, McClellan MB. Malpractice pressure, managed care, and physician behavior. In: Viscusi WK, ed. *Regulation Through Litigation*. Washington, DC: Brookings Institution Press; 2002. †
  - 2.3. Hellinger FJ, Encinosa WE. The impact of state laws limiting malpractice awards on the geographic distribution of physicians. Agency for Healthcare Research and Quality. 2003. Available at: <http://www.ahrq.gov/research/tortcaps/tortcaps.pdf>. Accessed March 28, 2005. †
  - 2.4. Rubin RJ, Mendelson DN. *Defensive Medicine and Medical Liability Reform: Estimating Costs and Potential Savings*. Fairfax, Va: Lewin-VHI; 1993. †
  - 2.5. Kessler DP, McClellan MB. Malpractice law and health care reform: optimal liability policy in an era of managed care. *J Pub Econ*. 2002;84:175-197. †
  - 2.6. Dubay L, Kaestner R, Waidmann T. The impact of malpractice fears on cesarean section rates. *J Health Econ*. 1999;18:491-522.
    - 2.6.1. U.S. Senate Subcommittee on Nutrition and Human Needs, 1969. *Medical Malpractice: The patient versus the Physician*. Committee Print, 91<sup>st</sup> Congress, 1<sup>st</sup> Session, U.S. Government Printing Office, Washington DC. †
    - 2.6.2. Marieskind, H.I., 1979. An evaluation of cesarean section in the United States. Final Report submitted to the Department of Health, Education, and Welfare, Office of the Assistant Secretary for Planning and Evaluation/Health. †
3. Chandra A, Nundy S, Seaburg SA. The growth of physician malpractice payments: evidence from the National Practitioner DataBank. *Health Aff (Millwood)*. 2005;24:w240–9. †
4. Hershey N. The defensive practice of medicine: myth or reality. *Milbank Mem Fund Q*. 1972;50:69–98. \*
5. US Congress: Office of Technology Assessment. *Defensive medicine and medical malpractice*. US Government Printing Office, Washington, DC (publication OTA-H-602). \*

**Tebano et al. 2018, 74 countries**

1. Kessler DP, Summerton N, Graham JR. Effects of the medical liability system in Australia, the UK, and the USA. *Lancet* 2006; 368: 240–6. \*

2. Asher E, Greenberg-Dotan S, Halevy J et al. Defensive medicine in Israel—a nationwide survey. *PLoS One* 2012; 7: e42613.
  - 2.1. US Congress, Office of Technology Assessment. Defensive medicine and medical malpractice, OTA-H – 602. Washington, DC: US Government Printing Office, July 1994. \*
3. Ortashi O, Virdee J, Hassan R et al. The practice of defensive medicine among hospital doctors in the United Kingdom. *BMC Med Ethics* 2013; 14: 42.
  - 3.1. Toker A, Shvarts S, Perry ZH, et al: Clinical guidelines, defensive medicine, and the physician between the two. *Am J Otolaryngol* 2004, 25(4):245–250.
    - 3.1.1. Van Boven K, Dijksterhuis P, Lamberts H. Defensive testing in Dutch family practice: Is the grass greener on the other side of the ocean? *Journal of Family Practice*. 1997;44(5):468-72. \*
    - 3.1.2. Summerton N. Positive and negative factors in defensive medicine: A questionnaire study of general practitioners. *British medical journal*. 1995;310(6971):27-9.
      - 3.1.2.1. McQuade JS. The medical malpractice crisis - reflections on the alleged causes and proposed cures: discussion paper. *J R Soc Med* 1991;84:408-11. \*
      - 3.1.2.2. Hershey N. Quoted in McKinlay JB, ed. *Politics and law in health care policy*. New York: Milbank Memorial Fund, 1973. †
      - 3.1.2.3. Dingwall R. Quoted in Hoyte P. *Medical negligence litigation*. *Medical Law Review*. (In press.) †
  - 3.2. Corrigan J, Wagner J, Wolfe L, et al: Report from congress medical malpractice reform and defensive medicine. *Cancer Invest* 1996, 14(3):277–284.
    - 3.2.1. OTA. Office of Technology Assessment. Defensive medicine and medical malpractice. Washington (DC). (Online) Available from: <http://ota.fas.org/reports/9405.pdf>. 1994 (Publication No. OTA-H-602). \*
  - 3.3. Summerton N: Trends in negative defensive medicine within general practice. *Br J Gen Pract* 2000, 50:565–566. \*

**Van Boven et al. 1997, The Netherlands**

- No reference.

**Vandersteegen et al. 2017, Belgium**

1. OTA (1994), Office of Technology Assessment. Defensive Medicine and Medical Malpractice, Washington, DC: US Government Printing Office. \*

**Yan et al. 2017, The Netherlands**

1. Studdert DM, Mello MM, Brennan TA (2004) Medical malpractice. *N Engl J Med* 350:283–292. <https://doi.org/10.1056/NEJMp035470>
  - 1.1. Defensive medicine and medical malpractice. OTA-H-602. Washington, D.C.: U.S. Congress, Office of Technology Assessment, 1994. \*
2. Tancredi LR, Baroness JA (1978) The problem of defensive medicine. *Science* 200:879–882
  - 2.1. Report of the Secretary's Commission on Medical Malpractice (DHEW Publ. No. OS-73-89, Department of Health, Education, and Welfare, Washington, D.C., 1973) †
  - 2.2. *Duke Law J*. 1971, 939 (1971) †
